# Supplementary material for: Peginterferon-lambda for the treatment of COVID-19 in outpatients
Source: bioRxiv or medRxiv preprint supplement (doi:10.1101/2020.11.09.20228098), 2020-11-12
Supplement: Supplementary file [file media-1.zip]

## **Supplementary Appendix**

This appendix has been provided by the authors to give readers additional information about their work.

Supplement to: Feld JJ, Kandel C, Biondi MJ, et al. Peginterferon-lambda for the treatment of COVID-19 in outpatients.

## Supplementary Appendix

|                             |    |
|-----------------------------|----|
| Supplemental Methods .....  | 3  |
| Supplemental Figure 1 ..... | 4  |
| Supplemental Figure 2 ..... | 5  |
| Supplemental Figure 3 ..... | 6  |
| Supplemental Figure 4 ..... | 7  |
| Supplemental Figure 5 ..... | 8  |
| Supplemental Table 1 .....  | 9  |
| Supplemental Table 2 .....  | 10 |
| Supplemental Table 3 .....  | 11 |

## **Supplemental Methods**

### **SARS-CoV-2 Viral Load Testing**

A self-collected mid-turbinate swab was obtained. Samples were inactivated and viral nucleic acid was extracted using the NucliSENS EasyMAG platform (bioMerieux, Marcy-l'Etoile, France), and real-time reverse-transcriptase PCR was performed on the Rotorgene Q (Qiagen, Hilden, Germany) using the primers and probes for the SARS-CoV-2 E gene<sup>24,25</sup>. To generate standard curves, dilutions of a synthetic plasmid containing a segment of the E-gene were used (GenScript, USA). Samples with either no Ct value or a value that was below the level of quantification were counted as negative. For the purposes of calculation, values below the limit of quantification (~20 copies/mL) were given an arbitrary value of 10 copies/mL.

**Figure S1. Time to viral clearance in those with baseline viral load  $\geq 10E6$  copies/mL.**

The time to undetectable SARS-CoV-2 RNA is shown for the peginterferon-lambda and the placebo group for participants with a baseline viral load above  $10E6$  copies/mL. The curves are compared using the log-rank test and the median time to clearance with 95% CI is shown for each group.

**Figure S2. Proportion negative for SARS-CoV-2 RNA over time and mean absolute and change in SARS-CoV-2 viral load over time in those with detectable SARS-CoV-2 at baseline.**

The proportion of patients negative for SARS-CoV-2 RNA per day post-injection in those with a detectable viral load at baseline (Panel a) with the mean SARS-CoV-2 RNA viral load (Panel b) and log decline from baseline (Panel c) over time in participants with a detectable baseline viral load in the peginterferon-lambda treatment (n=25) and placebo groups (n=20).

\*Panel b: Difference at Day 7  $p=0.042$

\*Panel c: Difference at Day 5  $p=0.036$  and Day 7  $p=0.006$

**Figure S3. Odds ratio for clearance by Day 7 with peginterferon-lambda vs placebo, controlled for individual baseline covariates, in those with baseline viral load  $\geq 10E6$  copies/mL**

Forest plot showing odds ratio with 95% CI for the odds of clearance by Day 7 with peginterferon lambda treatment compared to placebo, controlled for each individual (bivariate) covariate.

**Figure S4. Presence of SARS-CoV-2 antibodies over time stratified by baseline viral load.**

The proportion of individuals with positive anti-SARS-CoV-2 S protein IgG antibodies per day post-injection, stratified by baseline viral load above or below 10E6 copies/mL.

**Figure S5. Self-collected oral temperature measurements.**

Self-collected oral temperature measurements on days 0, 2, 3, 4, 5, 6, 7, 10, 12 and 14 separated into  $<38^{\circ}$  Celsius,  $38-39^{\circ}$  Celsius and above  $39^{\circ}$  Celsius stratified by group.

**Table S1. Residual SARS-CoV-2 RNA levels at Day 7 post-treatment in those with baseline viral loads above and below 10E6 copies/mL**

| Baseline Viral Load | Residual Baseline Viral Load at Day 7 in Copies/mL       |                                                                                                                         |
|---------------------|----------------------------------------------------------|-------------------------------------------------------------------------------------------------------------------------|
|                     | Peginterferon-Lambda                                     | Placebo                                                                                                                 |
| ≥ 10E6 copies/mL    | n=4/19 (21%)<br><br>2.74E3<br>4.59E3<br>7.95E3<br>8.58E5 | n=10/16 (62.5%)<br><br>1.61E1<br>3.10E2<br>5.10E3<br>4.28E4<br>1.46E5<br>1.66E5<br>2.62E5<br>4.17E5<br>6.49E5<br>6.40E6 |
| < 10E6 copies/mL    | n=1/11 (9%)<br><br>2.41E3                                | n=1/14 (7%)<br><br>1.82E3                                                                                               |

**Table S2. Association between peginterferon-lambda treatment vs placebo with specific symptom categories and with symptom evolution over time. Results shown for all participants and stratified by baseline viral load.**

| Symptom Category    | Change in severity (day)     | All samples        |         | Baseline Viral Load $\geq 10E6$ copies/mL |         | Baseline Viral Load $< 10E6$ copies/mL |         |
|---------------------|------------------------------|--------------------|---------|-------------------------------------------|---------|----------------------------------------|---------|
|                     |                              | OR (95% CI)        | p-value | OR (95% CI)                               | p-value | OR (95% CI)                            | p-value |
| All Symptoms        |                              |                    |         |                                           |         |                                        |         |
|                     | Peginterferon-lambda         | 0.71 (0.61, 0.82)  | <.0001  | 0.74 (0.62, 0.88)                         | 0.0007  | 0.68 (0.53, 0.87)                      | 0.0024  |
|                     | Placebo                      | 0.64 (0.55, 0.75)  | <.0001  | 0.60 (0.48, 0.74)                         | <.0001  | 0.76 (0.60, 0.96)                      | 0.0187  |
|                     | <i>Difference in decline</i> |                    | 0.32    |                                           | 0.10    |                                        | 0.46    |
| Fever/Systemic      |                              |                    |         |                                           |         |                                        |         |
|                     | Peginterferon-lambda         | 0.72 (0.62, 0.84)  | <.0001  | 0.77 (0.67, 0.90)                         | 0.0008  | 0.64 (0.53, 0.77)                      | <.0001  |
|                     | Placebo                      | 0.60 (0.49, 0.73)  | <.0001  | 0.64 (0.52, 0.77)                         | <.0001  | 0.55 (0.43, 0.69)                      | <.0001  |
|                     | <i>Difference in decline</i> |                    | 0.06    |                                           | 0.06    |                                        | 0.24    |
| Respiratory         |                              |                    |         |                                           |         |                                        |         |
|                     | Peginterferon-lambda         | 0.64 (0.51, 0.80)  | <.0001  | 0.70 (0.55, 0.88)                         | 0.002   | 0.48 (0.26, 0.91)                      | 0.024   |
|                     | Placebo                      | 0.52 (0.39, 0.69)  | <.0001  | 0.58 (0.42, 0.78)                         | 0.0004  | 0.41 (0.20, 0.83)                      | 0.013   |
|                     | <i>Difference in decline</i> |                    | 0.19    |                                           | 0.29    |                                        | 0.61    |
| Gastrointestinal    |                              |                    |         |                                           |         |                                        |         |
|                     | Peginterferon-lambda         | 0.92 (0.75, 1.15)* | 0.47    | 0.92 (0.83, 1.01)*                        | 0.091   | 0.98 (0.74, 1.3)*                      | 0.90    |
|                     | Placebo                      | 0.57 (0.42, 0.77)  | 0.0003  | 0.53 (0.41, 0.69)                         | <.0001  | 0.61 (0.42, 0.9)                       | 0.013   |
|                     | <i>Difference in decline</i> |                    | 0.0004  |                                           | 0.0001  |                                        | 0.0001  |
| Musculoskeletal     |                              |                    |         |                                           |         |                                        |         |
|                     | Peginterferon-lambda         | 0.54 (0.35, 0.83)  | 0.005   | 0.51 (0.33, 0.8)                          | 0.003   | 0.63 (0.46, 0.85)                      | 0.003   |
|                     | Placebo                      | 0.50 (0.32, 0.77)  | 0.002   | 0.48 (0.31, 0.75)                         | 0.001   | 0.48 (0.20, 1.17)                      | 0.11    |
|                     | <i>Difference in decline</i> |                    | 0.70    |                                           | 0.81    |                                        | 0.57    |
| Skin                |                              |                    |         |                                           |         |                                        |         |
|                     | Peginterferon-lambda         | 0.89 (0.57, 1.38)  | 0.59    | 0.79 (0.37, 1.67)                         | 0.53    | 0.40 (0.02, 9.51)                      | 0.37    |
|                     | Placebo                      | 0.88 (0.57, 1.35)  | 0.56    | 0.50 (0.16, 1.60)                         | 0.24    | 0.91 (0.73, 1.13)                      | 0.22    |
|                     | <i>Difference in decline</i> |                    | 0.96    |                                           | 0.19    |                                        | 0.15    |
| Neurologic/Vascular |                              |                    |         |                                           |         |                                        |         |
|                     | Peginterferon-lambda         | 0.68 (0.47, 0.98)  | 0.037   | 0.72 (0.53, 0.98)                         | 0.034   | 0.63 (0.48, 0.83)                      | 0.001   |
|                     | Placebo                      | 0.60 (0.36, 0.98)  | 0.043   | 0.63 (0.43, 0.93)                         | 0.019   | 0.51 (0.34, 0.76)                      | 0.001   |
|                     | <i>Difference in decline</i> |                    | 0.52    |                                           | 0.5     |                                        | 0.32    |
| Mood                |                              |                    |         |                                           |         |                                        |         |
|                     | Peginterferon-lambda         | 0.59 (0.29, 1.20)  | 0.14    | 0.64 (0.35, 1.19)                         | 0.16    | 0.56 (0.30, 1.07)                      | 0.077   |
|                     | Placebo                      | 0.34 (0.12, 0.98)  | 0.046   | 0.38 (0.13, 1.10)                         | 0.074   | 0.52 (0.29, 0.93)                      | 0.029   |
|                     | <i>Difference in decline</i> |                    | 0.14    |                                           | 0.20    |                                        | 0.88    |

**Table S3. The specific severe symptoms reported by participants in each treatment group.**

| <b>PegIFN Lambda</b> | <b>ID 3</b> | <b>ID 18</b>  | <b>ID 9</b> | <b>ID 15</b> | <b>ID 31</b> | <b>ID 47</b> | <b>ID 52</b> |
|----------------------|-------------|---------------|-------------|--------------|--------------|--------------|--------------|
| <b>Day 0</b>         | throat      |               |             | smell        | smell        | smell        | smell        |
| <b>Day 0.5</b>       | throat      |               |             |              |              | smell        |              |
| <b>Day 1</b>         |             |               |             |              | smell        | smell        |              |
| <b>Day 2</b>         | fever       |               |             |              | smell        | smell        |              |
| <b>Day 3</b>         | cough       |               |             |              |              | smell        |              |
| <b>Day 4</b>         |             |               |             |              |              |              |              |
| <b>Day 5</b>         |             |               | smell       |              |              |              |              |
| <b>Day 6</b>         |             | cough,<br>SOB | smell       |              |              |              |              |
| <b>Day 7</b>         |             |               |             |              |              |              |              |
| <b>Day 10</b>        |             |               | smell       |              |              |              |              |
| <b>Day 12</b>        |             |               | smell       |              |              |              |              |
| <b>Day 14</b>        |             | cough,<br>SOB |             |              |              |              |              |

| <b>Placebo</b> | <b>ID 5</b> | <b>ID 11</b> | <b>ID 16</b>               | <b>ID 27</b> | <b>ID 33</b>                                             | <b>ID 51</b>         | <b>ID 60</b> |
|----------------|-------------|--------------|----------------------------|--------------|----------------------------------------------------------|----------------------|--------------|
| <b>Day 0</b>   | chills      |              | fever,<br>smell,<br>nausea | fatigue      | cough, fever, chills,<br>nausea, vomit                   | smell                |              |
| <b>Day 0.5</b> |             |              |                            |              | cough, throat                                            | fatigue,<br>headache |              |
| <b>Day 1</b>   |             |              |                            |              | cough, fever, chills,<br>throat, myalgia,<br>abdo, vomit | smell                |              |
| <b>Day 2</b>   |             |              | fatigue,<br>nausea         |              |                                                          | fatigue,<br>smell    |              |
| <b>Day 3</b>   |             |              | fatigue,<br>nausea         |              |                                                          | fatigue,<br>smell    |              |
| <b>Day 4</b>   |             | fatigue      | fatigue                    |              |                                                          |                      |              |
| <b>Day 5</b>   |             | fatigue      |                            |              |                                                          |                      | cough        |
| <b>Day 6</b>   |             |              |                            |              | diarrhea                                                 |                      |              |
| <b>Day 7</b>   |             |              |                            |              |                                                          |                      |              |
| <b>Day 10</b>  |             |              |                            |              |                                                          |                      |              |
| <b>Day 12</b>  |             |              |                            |              |                                                          |                      |              |
| <b>Day 14</b>  |             |              |                            |              |                                                          |                      |              |

Smell – loss of sense of smell/taste, SOB – shortness of breath; abdo – abdominal pain
